# Supplementary material
Source: PubMed Central journal article supplement (PMC2795566)
Supplement: NIHMS156155-supplement-Table.pdf [file NIHMS156155-supplement-Table.pdf]

**Supplementary Table. Abnormal CMA Results in 109 Neonates with Birth Defects**

|    | Indication       | GTG-banding Analysis          | CMA         | CMA Results                                                                                                                                       |
|----|------------------|-------------------------------|-------------|---------------------------------------------------------------------------------------------------------------------------------------------------|
| 1  | DF               | DP, del(1)(p36.1p36.2)        | V6          | arr cgh 1p36.32p36.13(RP1-58B11->RP11-387P17)x1                                                                                                   |
| 2  | CHD, VSD         | RS visible                    | V6<br>OLIGO | arr cgh 1p36.32p36.13(RP11-22L13->RP11-387P17)x1.ish<br>del(1)(p36.23p36.23)(RP11-92O17-)                                                         |
| 3  | DF, MCA          | RS visible                    | V6<br>OLIGO | arr cgh 1p34.3p33(RP11-248I9->RP11-492I2)x3.ish<br>dup(1)(p34.2p33)(RP11-248I9++,RP11-72N2++,RP11-492I2++)dn                                      |
| 4  | Neuromuscular    | ND                            | V6<br>OLIGO | arr cgh 1p32.1p31.3(RP11-63G10,RP11-524L19)x1.ish<br>del(1)(p32.1p32.1)(RP11-63G10-)                                                              |
| 5  | DF, MCA,         | RS visible                    | V6<br>OLIGO | arr cgh 1q21.1q24.3(RP11-337C18->RP11-44A10)x3.nuc ish<br>1q21.3q23.3(RP11-81P11x3,RP11-38C18x3)                                                  |
| 6  | MCA              | DP, add(1)(q?42.1)            | V5          | arr cgh 1q42(RP5-1090A23)x1,1q44(RP11-370K11)x3dn.ish<br>del(1)(q42.1q42.1)(RP5-1090A23-).nuc ish 1q44(RP11-370K11x3)dn                           |
| 7  | DF, MCA, IUGR    | RS visible                    | V6<br>OLIGO | arr cgh 1q42.12q43(RP11-496N12->RP11-136B18)x1.ish<br>del(1)(q42.3q42.3)(RP11-478H16-)                                                            |
| 8  | DF, CHD          | CO, NL                        | V5          | arr cgh 2p25.3(RP11-379N10,RP11-625N16)x3.nuc ish 2p25.3(RP11-379N10x3)                                                                           |
| 9  | DF, Cleft Palate | ND                            | V5          | arr cgh 2q22.3(RP11-89L3,RP11-90K5)x1.ish<br>del(2)(q22.3q22.3)(RP11-89L3-,EP11-90K5-)                                                            |
| 10 | FTT              | CO, NL                        | V6          | arr cgh 2q32.1(RP11-234L7)x3.nuc ish 2q32.1(RP11-234L7x3)dn                                                                                       |
| 11 | MCA              | CO, der(2)t(2;8)(q37.1;q24.1) | V5          | arr cgh 2q37.1(RP11-690I21->RP11-491D2)x1,8q24.3(RP11-149P24->RP11-299M14)x3                                                                      |
| 12 | DF               | CO, del(3)(p26.3)             | V6<br>OLIGO | arr cgh 3p26.3(RP11-385A18->RP11-33J20)x1.ish<br>del(3)(p26.3p26.3)(RP11-392M7-)mat                                                               |
| 13 | MCA, CHD         | CO, del(3)(p25)               | V5          | arr cgh 3p26.3p25.3(RP11-385A18->RP11-45B16)x1                                                                                                    |
| 14 | DF               | CO, add(3)(p26)               | V5          | arr cgh 3p26.3(RP11-385A18->RP11-392M7)x1,3p26.2p25.3(RP11-33J20->RP11-45B16)x3.ish del(3)(p26.3p26.3)(D3S4559-),dup(3)(p26.1p26.1)(RP11-194C9x3) |
| 15 | DF, Hypotonia    | DP, NL                        | V5          | arr cgh 3p26.3p25.1(RP11-385A18->RP11-271E2)x3,18p11.32p11.23(RP11-705O1->RP11-931H21)x1.ish<br>t(3;18)(3p26.3;18p11.3)(D3S4559+,D18S552-)        |
| 16 | MCA              | RS visible, der(4)t(4;11)     | V6<br>OLIGO | arr cgh 4p16.3(RP11-613L20->RP11-357G3)x1,11p15.5(RP13-46H24->RP11-38L8)x3.ish der(4)t(4;11)(p16.3;p15.5)(RP11-613L20-,RP13-870H17+)              |
| 17 | CA               | ND                            | V6<br>OLIGO | arr cgh 4p16.3p16.1(RP11-322F4->RP11-338K13)x3,8p23.3.p23.1(RP11-91J19->RP11-16G12)x1                                                             |
| 18 | DF, MCA          | CO, del(4)(p16.2)             | V6<br>OLIGO | arr cgh 4p16.3p16.1(RP11-613L20->RP11-136I13)x1,9q34.3(RP11-611D20->RP11-974F22)x3.ish der(4)t(4;9)(p16.3;q34.3)(RP11-613L20-,RP13-467E5+)        |
| 19 | MCA              | ND                            | V5          | arr cgh 1p36.2(RP11-584P2)x3,4p16.3p15.3(GS-36P21->RP11-                                                                                          |

|    |                                   |                                  |             |                                                                                                                                                                                                                            |
|----|-----------------------------------|----------------------------------|-------------|----------------------------------------------------------------------------------------------------------------------------------------------------------------------------------------------------------------------------|
| 20 | DF, MCA, FTT                      | ND, dn                           | V6<br>OLIGO | 34C20)x1.nuc ish 1p36.2(RP11-584P2x3),del(4)(p16.3p16.3)(RP11-203L2-)<br>arr cgh 4q21.1q21.22(RP11-630D6->RP11-29L8)x1.ish<br>del(4)(q21.22q21.22)(RP11-29L8-)dn<br>arr cgh 17p13.3(RP11-235E17->RP11-48B14)x1             |
| 21 | DF                                | RS visible, dup 4q               | V6          | arr cgh 4q25q26(RP11-380D23->RP11-779N9)x3.nuc ish 4q25(RP11-777N19x3)                                                                                                                                                     |
| 22 | DF, TOF                           | RS visible, dup 4q               | V6          | arr cgh 4q27q35.1(RP11-679C8->RP11-203L17)x3.nuc ish<br>4q35.1(RP11-203L17x3)                                                                                                                                              |
| 23 | DF, MCA, SD                       | DP, NL. RS visible               | V5          | arr cgh 4q35.1q35.2(RP11-203L17->RP11-565A3)x1.ish<br>del(4)(q35.1q35.2)(RP11-173M11-,RP11-565A3-)                                                                                                                         |
| 24 | DF                                | CO, NL                           | V6<br>OLIGO | arr cgh 4q35.2(RP11-565A3)x3,15q15.3(RP11-315A19->RP11-263I19)x1.nuc ish 4q35.2(RP11-565A3x3)dn.ish del<br>(15)(q15.3q15.3)(RP11-263I19-)pat                                                                               |
| 25 | CHD, VSD,<br>Laryngomalacia       | ND                               | V6<br>OLIGO | arr cgh 5p15.33(RP11-487N22->RP11-121L11)x1.ish<br>del(5)(p15.33p15.33)(RP11-43F13-)                                                                                                                                       |
| 26 | DF                                | RS visible                       | V6          | arr cgh 5p15.33(RP11-227M19->RP11-121L11)x1                                                                                                                                                                                |
| 27 | Craniofacial Abnl                 | DP, del(5)(p15.2)                | V6          | arr cgh 5p15.3p15.2(RP11-487N22->RP11-91M12)x1                                                                                                                                                                             |
| 28 | DF                                | CO, del(5)(p13p15.33)            | V5          | arr cgh 5p15.3p14.2(RP11-227M19->RP11-91L13)x1                                                                                                                                                                             |
| 29 | DF                                | RS visible                       | V6          | arr cgh 5p15.33p14.2(RP11-487N22->RP11-91L13)x1                                                                                                                                                                            |
| 30 | Ambiguous Genitalia,<br>Premature | CO, der(5)(qter->q34::p14->qter) | V6<br>OLIGO | arr cgh 5p15.33p14.2(RP11-487N22->RP11-91L13)x1,5q34q35.3(RP11-109J4->RP11-80J19)x3.ish<br>der(5)t(5;5)(p14.2;q34)(RP11-21I4+)<br>arr cgh 16p13.2(RP11-349E19)x1.ish del(16)(p13.2p13.2)(RP11-349E19-)                     |
| 31 | MCA                               | RS visible, dn                   | V6<br>OLIGO | arr cgh 5q12.1q12.3(RP11-1A7->RP11-307L14)x1dn                                                                                                                                                                             |
| 32 | Craniofacial Abnl<br>Syndactyly   | ND                               | V6          | arr cgh 5q23.3(RP11-81L23)x3.nuc ish 5q23.3(RP11-81L23x3)dn                                                                                                                                                                |
| 33 | Hydrocephalus                     | CO, NL                           | V5          | arr cgh 6p25.3(RP1-20B11->RP11-82M9)x1.ish<br>del(6)(p25.3p25.3)(RP1-20B11-)                                                                                                                                               |
| 34 | CHD, interrupted<br>Aortic Arch   | RS visible                       | V6<br>OLIGO | arr cgh 6p24.3p22.3(RP11-380L24->RP1-239K6)x1                                                                                                                                                                              |
| 35 | No                                | ND                               | V6<br>OLIGO | arr cgh Xp22.32p22.31(RP11-707P20->RP11-483M24)x2.nuc ish<br>Xp22.32(RP11-594H22x2)mat.<br>arr cgh 6p25.3p23(RP11-812K10->RP11-127P7)x3,6q26q27(RP1-45F6->RP11-115L8)x1.ish der(6)t(6;6)(p23;q26)(RP11-299J5+,RP3-366N23-) |
| 36 | Trisomy 18                        | ND                               | V5          | arr cgh 6q27(RP3-495K2)x1,10q24q26.3(RP11-108L7->RP11-140A10)x3.nuc ish der(6)t(6;10)(q27;q26.3)                                                                                                                           |

|    |                                 |                                                                   |             |                                                                                                                                                                          |
|----|---------------------------------|-------------------------------------------------------------------|-------------|--------------------------------------------------------------------------------------------------------------------------------------------------------------------------|
| 37 | FTT                             | ND                                                                | V6<br>OLIGO | (RP3-495K2-,RP11-462G8+)<br>arr cgh 7q11.23(RP11-622P13->RP4-665P5)x3.nuc ish 7q11.23(RP11-622P13x3)                                                                     |
| 38 | DF                              | ND                                                                | V5          | arr cgh 7q11.2(RP5-1127A24->RP4-665P5)x1.ish<br>del(7)(q11.2q11.2)(RP11-622P13-)                                                                                         |
| 39 | CHD, Truncus<br>Arteriosis      | ND                                                                | V6          | arr cgh 7q31.3(RP11-563L14)x3.nuc ish 7q31.3(RP11-563L14X3)dn                                                                                                            |
| 40 | DF                              | CO, del(7)(q32q34)                                                | V6<br>OLIGO | arr cgh 7q32.2q34(RP11-2E11->RP11-137O4)x1.ish<br>del(7)(q33q33)(RP11-98D12-)                                                                                            |
| 41 | MCA                             | CO, del(7)(q33)                                                   | V6          | arr cgh 7q34q36.3(RP11-137O4->RP11-789H4)x1.ish<br>del(7)(q36.3)(GS-3K23-,RP11-452C13-)                                                                                  |
| 42 | CHD                             | CO, del(8)(p23.1p23.1)                                            | V6<br>OLIGO | arr cgh 8p23.1(RP11-90J21->RP11-589N15)x1                                                                                                                                |
| 43 | CHD                             | ND                                                                | V6<br>OLIGO | arr cgh 8p23.1(RP11-90J21->RP11-589N15)x1.ish<br>del(8)(p23.1p23.1)(RP11-252K12-)dn                                                                                      |
| 44 | DF, MCA                         | RS visible, der(8)t(8;8)                                          | V6<br>OLIGO | arr cgh 8p23.3p23.1(RP11-91J19->RP11-79E11)x1,8q22.1q24.3(RP11-80P10->RP11-639O3)x3.<br>ish der(8)t(8;8)(p23.1;q22.1)(RP11-555E9-,RP11-149P24+)                          |
| 45 | MCA                             | ND                                                                | V6<br>OLIGO | arr cgh 8q11.21q12.1(RP11-1134I14->RP11-107M13)x1.ish<br>del(8)(q11.21q11.21)(RP11-113H14-)dn                                                                            |
| 46 | DF, Renal Anomaly               | ND                                                                | V6<br>OLIGO | arr cgh 8q13.3(RP11-326E22->RP11-1102P16)x1.ish<br>del(8)(q13.3q13.3)(RP11-326E22-)                                                                                      |
| 47 | R/O Trisomy 13, 18,<br>21       | CO, del(8)(q24.11q24.22)                                          | V5          | arr cgh 8q23.3q24.2(RP11-80P10->P30)x1.ish del(8)(q24.1q24.1)(P30-)                                                                                                      |
| 48 | DF                              | CO, inv(9)(p11q13), der(15)(9pter->p11::9q13->p11::15q10->15qter) | V6<br>OLIGO | arr cgh 9p24.3p13.1 (RP11-165F24->CTD-2349C9)x3                                                                                                                          |
| 49 | Craniofacial Abnl               | ND                                                                | V6<br>OLIGO | arr cgh 9p23(RP11-3L8,RP11-115I23)x3.nuc ish 9p23(RP11-3L8x3)                                                                                                            |
| 50 | DF                              | CO,<br>der(9)del(9)(p22.2)dup(9)(p22.2p13.3)                      | V6<br>OLIGO | arr cgh 9p24.3p22.2(RP11-165F24->RP11-163F8)x1.ish<br>del(9)(p24.3p24.3)(RP11-165F24-)<br>arr cgh 9p22.1p21.1(RP11-399M15->RP11-30O4)x3.nuc ish<br>9p22.1(RP11-399M15x3) |
| 51 | MCA                             | CO, NL, RS visible                                                | V6<br>OLIGO | arr cgh 10q11.22q11.23(RP11-70E21,RP11-563N6)x1.ish<br>del(10)(q11.22q11.23)(RP11-70E21-,RP11-563N6-)pat                                                                 |
| 52 | DF, MCA, Ambiguous<br>Genitalia | RS visible, del(10),t(12;15)                                      | V5          | arr cgh 10q26.1q26.3(RP11-338O1->RP11-426G8)x1                                                                                                                           |
| 53 | MCA                             | RS visible, der(10)t(10;18)                                       | V6<br>OLIGO | arr cgh 10q26.13q26.3(RP11-338O1->RP11-108K14)x1,18q23(RP11-162A12->RP11-89N1)x3.ish der(10)t(10;18)(q26.13;q23)(RP11-462G8-,RP11-451L19+)                               |
| 54 | DF, MCA                         | ND                                                                | V5          | arr cgh 11p15.5p11.2(RP11-706A13->RP13-46H24)x3.nuc ish                                                                                                                  |

|    |                                       |                                  |       |                                                                                                     |
|----|---------------------------------------|----------------------------------|-------|-----------------------------------------------------------------------------------------------------|
| 55 | CHD, Coarctation of Aorta             | RS visible                       | V6    | 11p15.5(RP5-998N23x3)                                                                               |
| 56 | DF, MCA                               | ND                               | OLIGO | arr cgh 11q14.2q25(RP11-720D4->RP11-419F8)x3.                                                       |
| 57 | GI Abnl                               | RS visible, der(12)              | V6    | arr cgh 11q23.2q25(RP11-64D24->RP11-469N6)x3,13q12.11q12.3(RP11-301J16->RP11-90M5)x3.               |
| 58 | DF                                    | RS visible, der(15)t(12;15)      | OLIGO | ish der(13)t(11;13)(q23.2;q12.3)(RP11-861E23+,RP11-90M5+)                                           |
| 59 | Trisomy 13                            | CO, +13                          | V6    | arr cgh 12q21.2(RP11-734E19->RP11-8P16)x1.ish                                                       |
| 60 | DF, Polydactyly, Cataracts            | DP, +13                          | OLIGO | der(12)del(12)(q21.2q21.2)inv(12)(q13.2q23.3)(RP11-8P16-)                                           |
| 61 | DF                                    | RS confirm                       | V6    | arr cgh 12q24.31qter(RP11-197N18->RP11-386I8)x3.nuc ish                                             |
| 62 | Trigonocephaly                        | CO, der(13)t(13;13)(p11.1;q14.1) | V6    | der(15)t(12;15)(q24.31;p11.2)(RP11-669N7+)                                                          |
| 63 | Dandy Walker Syndrome                 | DP, add(13)(q12)                 | V6    | arr cgh 13(47 BAC)x3                                                                                |
| 64 | DF, Macrocephaly, Club Feet           | CO,                              | V6    | arr cgh 13(47 BAC)x3                                                                                |
| 65 | Cyanotic Episode                      | der(14;14)(q10;q10)[3]/46,XX[38] | OLIGO | arr cgh 13q14.2q34(RP11-305D15->RP11-569D9)x3                                                       |
| 66 | Trisomy 13, 18, 21                    | CO, del(15)(q11.2q13)            | V6    | arr cgh 13q14.3q33.2(RP11-768P11->RP11-166E2)x1                                                     |
| 67 | DF, Cryptorchidism, R/O Trisomy 13/18 | ND                               | V6    | arr cgh 14(RP11-98N22->RP11-47P23)x3.nuc ish 14q32.2(RP11-187K17x3)[84]/14q32.2(RP11-187K17x2)[116] |
| 68 | DF, MCA                               | ND                               | OLIGO | arr cgh 14q11.2q21.1(RP11-76P17->RP11-588D7)x1.ish                                                  |
| 69 | RUBINSTEIN TAYBI                      | ND                               | V6    | der(18)t(14;18)(q11.2;p11.3)(RP11-260G13-)                                                          |
| 70 | Trisomy 18                            | CO, +18                          | OLIGO | arr cgh 15q11.2q12(RP11-289D12)->RP11-345N11)x1.ish                                                 |
| 71 | DF, Possible Trisomy 18               | CO, +18                          | V6    | del(15)(q11.2q11.2)(5e9-)                                                                           |
| 72 | Goldenhar Syndrome                    | CO, +18                          | V6    | arr cgh 15q11.2q12(RP11-289D12-->RP11-345N11)x1                                                     |
| 73 | Heterotaxy                            | DP, NL                           | V6    | arr cgh 15q11.2q12(RP11-484P15->RP11-345N11)x1.ish                                                  |
| 74 | Trisomy 21                            | DP, +21                          | OLIGO | del(15)(q11.2q12)(5e9-)                                                                             |
| 75 | DF, Trisomy 21, Noonan's              | CO, +21                          | V6    | arr cgh 16p13.3(RP11-75P12,RP11-95J11)x1.ish                                                        |
| 76 | Trisomy 21                            | CO, +21                          | OLIGO | del(16)(p13.3p13.3)(RT100-,RT166-)                                                                  |
|    |                                       |                                  | V6    | arr cgh 18(44 BAC)x3                                                                                |
|    |                                       |                                  | V6    | arr cgh 18(44 BAC)x3                                                                                |
|    |                                       |                                  | OLIGO | arr cgh 18(44 BAC)x3                                                                                |
|    |                                       |                                  | V6    | arr cgh 19p13.3(RP11-52O9)x3,nuc ish 19p13.3(RP11-52O9x2)dn                                         |
|    |                                       |                                  | V5    | arr cgh 21(16 BAC)x3                                                                                |
|    |                                       |                                  | V5    | arr cgh 21(16 BAC)x3                                                                                |
|    |                                       |                                  | V6    | arr cgh 21(19 BAC)x3                                                                                |

|    |                               |                           |             |                                                                                                                                                                                                           |
|----|-------------------------------|---------------------------|-------------|-----------------------------------------------------------------------------------------------------------------------------------------------------------------------------------------------------------|
| 77 | DF, Possible Trisomy 21       | CO, +21                   | V6          | arr cgh 21(19 BAC)x3                                                                                                                                                                                      |
| 78 | DF, Cleft Palate, Trisomy 21  | CO, +21                   | V6          | arr cgh 21(19 BAC)x3.ish 21q22.3(DSCRx3)                                                                                                                                                                  |
| 79 | Trisomy 21                    | CO, +21                   | V6          | arr cgh 21(19 BAC)x3                                                                                                                                                                                      |
| 80 | DF                            | CO, +21                   | OLIGO<br>V6 | arr cgh 21(19 BAC)x3                                                                                                                                                                                      |
| 81 | DF, MCA                       | CO, +21                   | OLIGO<br>V6 | arr cgh 21(19 BAC)x3                                                                                                                                                                                      |
| 82 | DF, MCA, CHD                  |                           | OLIGO<br>V6 | arr cgh 22(20 BAC)x3.ish 22q11.2(RP11-296H20x3),22q13.1(RP11-69B8x3)                                                                                                                                      |
| 83 | MCA                           | DP(prenatal), NL          | V5          | arr cgh 22q11.2(RP11-186O8->RP11-165F18)x1.ish del(22)(q11.2q11.2)(D22S75-)                                                                                                                               |
| 84 | MCA                           | CO, NL                    | V5          | arr cgh 22q11.2(RP11-186O8->RP11-165F18)x1.ish del(22)(q11.2q11.2)(D22S75-)                                                                                                                               |
| 85 | CHD                           | CO, NL                    | V5          | arr cgh 22q11.2(RP11-186O8->RP11-165F18)x1.ish del(22)(q11.2q11.2)(RP11-186O8-)                                                                                                                           |
| 86 | DF                            | ND                        | V5          | arr cgh 22q11.2(RP11-186O8->RP11-165F18)x1.ish del(22)(q11.2q11.2)(RP11-186O8-)                                                                                                                           |
| 87 | CHD                           | CO, del(22)(q11.21q11.23) | V5          | arr cgh 22q11.2(RP11-186O8->RP11-165F18)x1.ish del(22)(q11.2q11.2)(RP11-316L10x1)                                                                                                                         |
| 88 | CHD                           | DP, del 22q               | V6          | arr cgh 3p26.3(RP11-306H5)x3.nuc ish 3p26.3(RP11-306H5x3)<br>arr cgh 13q12.12(RP11-760M1)x3.nuc ish 13q12.12(RP11-760M1x3)<br>arr cgh 22q11.21(RP11-186O8->RP11-165F18)x1.ish del(22)(q11.21q11.21)(N25-) |
| 89 | CHD                           | ND                        | V6          | arr cgh 22q11.2(RP11-186O8->RP11-165F18)x1.ish del(22)(q11.2q11.2)(F5-,D22S75-)                                                                                                                           |
| 90 | CHD, Truncus Arteriosus       | CD, del(22)(q11.21q11.23) | V6          | arr cgh 22q11.21(RP11-186O8->RP11-165F18)x1.ish del(22)(q11.21q11.21)(N25-)                                                                                                                               |
| 91 | CA                            | ND                        | V6          | arr cgh 22q11.21(RP11-186O8->RP11-165F18)x1.ish del(22)(q11.21q11.21)(RP11-186O8-)                                                                                                                        |
| 92 | CHD                           | CO, NL                    | V6          | arr cgh 22q11.21(RP11-243A4->RP11-165F18)x1.ish del(22)(q11.21q11.21)(N25-)                                                                                                                               |
| 93 | CHD                           | ND                        | OLIGO<br>V6 | arr cgh 22q11.21(RP11-243A4->RP11-165F18)x1.ish del(22)(q11.21q11.21)(RP11-316L10-)                                                                                                                       |
| 94 | CHD, Coarctation of the Aorta | ND                        | OLIGO<br>V6 | arr cgh 22q11.21(RP11-243A4->RP11-165F18)x1.ish del(22)(q11.21q11.21)(RP11-316L10-)                                                                                                                       |
| 95 | DF,CHD                        | ND                        | OLIGO<br>V6 | arr cgh 22q11.21(RP11-316L10,RP11-165F18)x1.ish                                                                                                                                                           |

|     |                       |                                             |             |                                                                                                                                                                                                              |
|-----|-----------------------|---------------------------------------------|-------------|--------------------------------------------------------------------------------------------------------------------------------------------------------------------------------------------------------------|
| 96  | DF, Turner Syndrome   | CO, 45,X                                    | OLIGO<br>V6 | del(22)(q11.21q11.21)(RP11-316L10-)<br>arr cgh X(111 BAC)x1                                                                                                                                                  |
| 97  | DF                    | CO, NL                                      | OLIGO<br>V6 | arr cgh Yp11.2(RP11-115H13->RP11-418M8)x0, 4q35.1(RP11-173M11)x3.ish del(Y)(p11.2p11.2)(RP11-418M8-).nuc ish 4q35.1(RP11-173M11x3)                                                                           |
| 98  | DF, MCA               | ND                                          | V6          | mos arr cgh 12p13.33p11.21(RP11-598F7->RP11-8P13)x3.ish i(12)(p13.3p13.3)(RP11-407G6++)[5]/12p13.3(RP11-407G6x2)[5]nuc ish 12cen(cep12x3),12p13.3(RP11-407G6x4)[35]/12cen(cep12x2),12p13.3(RP11-407G6x2)[15] |
| 99  | DF, MCA               | DP, 45,X                                    | V6<br>OLIGO | mos arr cgh 12p13.33p11.21(RP11-598F7->RP11-8P13)x3nuc ish 12p13.32(RP11-429A20x2),12p13.33(RP11-359B12x2)[173]/12p13.32(RP11-429A20x6),12p13.33(RP11-359B12x6)[27]                                          |
| 100 | RDS                   | ND                                          | V6<br>OLIGO | mos arr cgh 12p13.33p11.21(RP11-598F7->RP11-8P13)x3.ish i(12)(p13.2q11)(RP11-656E20++,D12Z3+)[3/50].nuc ish (RP11-656E20x4,D12Z3x3)[37/200]                                                                  |
| 101 | DF                    | CO, NL                                      | V5          | mos trisomy 9.nuc ish 9cen(CEP 9x2)[139]/9cen(CEP 9x3)[57]                                                                                                                                                   |
| 102 | DF                    | ND                                          | V6          | mos trisomy 9                                                                                                                                                                                                |
| 103 | MCA                   | CO, 47,XY,+inv<br>dup(15)(q13)[39]/46,XY[1] | V6<br>OLIGO | arr cgh 15q11.2q13.3(RP11-289D12->RP11-348B17)x3.nuc ish 15q11.2(RP11-125E1x4)[91]/15q11.2(RP11-125E1x2)[9]                                                                                                  |
| 104 | DF, FTT               | CO, Mos +18                                 | V6<br>OLIGO | mos arr cgh 18(44 BAC)x3.ish 18(RP11-78H1x3,D18Z1x3)[26]/i(18)(p11.32q11.1)(RP11-78H1++D18Z1+)[4]                                                                                                            |
| 105 | IUGR                  | CO, 47,XX,+18[16]/46,XX[4]                  | V6<br>OLIGO | mos arr cgh 18p11.32q23(RP11-705O1->RP11-89N1)x3.nuc ish 18p11.32(RP11-607C2x3),18p11.22(RP11-752I5x3)[89/100]                                                                                               |
| 106 | MCA                   | RS visible, mos inv dup 22                  | V6<br>OLIGO | mos arr cgh 22q11.1q11.21(RP11-48E19->RP11-47L18)x3.nuc ish 22q11.21(RP11-91O6x3,RP11-165F18x3)[195]/22q11.21(RP11-91O6x4,RP11-165F18x4)[55]/22q11.21(RP11-91O6x2,RP11-165F18x2)[50]                         |
| 107 | Hypoplastic Lt. Heart | CO, 46,X,i(Y)(q10)[17]/45,X[3]              | V5          | mos Turner arr cgh X(66 BAC)x1,Y(9 BAC)x1                                                                                                                                                                    |
| 108 | Ambiguous Genitalia   | CO,<br>45,X[26]/46,X,indic(Y)(q11.2)[24]    | V6<br>OLIGO | mos Turner arr cgh Y(RP11-112L19->RP11-223K9)x0                                                                                                                                                              |
| 109 | Ambiguous Genitalia   | RS visible                                  | V6<br>OLIGO | mos Turner arr cgh Yp11.31q11.22(RP11-400O10->RP11-223K9)x1.nuc ish Xcen(DXZ1x1),Ycen(DYZ3x0)[88]/Xcen(DXZ1x1),Ycen(DYZ3x1)[12]                                                                              |

CHD, congenital heart disease; DF, dysmorphic features; MCA, multiple congenital anomalies;

RDS, respiratory distress syndrome; FTT, failure to thrive; GI, gastrointestinal; IUGR, intrauterine growth retardation; CDH, congenital diaphragmatic hernia

NL, normal; Abnl, abnormal; DP, done previously; CO, concurrent; ND, not done; RS, retrospective; Mos, mosaicism; mar, marker chromosome; dn, *de novo*; inv, inversion; dup, duplication; del, deletion; der, derivative; add, additional material
